# Supplementary material for: Tight bonding and high-efficiency utilization of S–S moieties to enable ultra-stable and high-capacity alkali-metal conversion batteries
Source: Royal Society of Chemistry journal article supplement (doi:10.1039/d0ta11049c), 2021-01-01
Supplement: d0ta11049c1.pdf [file d0ta11049c1.pdf]

## Supporting Information

### **Tight bonding and high-efficiency utilization of S-S moieties to enable ultra-stable and high-capacity alkali-metal conversion batteries**

*Keyi Chen,<sup>abc</sup> Wujie Qiu,<sup>ab</sup> Qingping Wu,<sup>ac</sup> Xuejun Zhou,<sup>abc</sup> Jianjun Liu<sup>ab</sup> and Chilin Li<sup>\*abc</sup>*

<sup>a</sup> State Key Laboratory of High Performance Ceramics and Superfine Microstructure, Shanghai Institute of Ceramics, Chinese Academy of Sciences, 585 He Shuo Road, Shanghai 201899, China. Email: [chilinli@mail.sic.ac.cn](mailto:chilinli@mail.sic.ac.cn)

<sup>b</sup> Center of Materials Science and Optoelectronics Engineering, University of Chinese Academy of Sciences, Beijing 100049, China.

<sup>c</sup> CAS Key Laboratory of Materials for Energy Conversion, Shanghai Institute of Ceramics, Chinese Academy of Sciences, Shanghai 201899, China.

#### **Experimental Section**

**Synthesis of Pyrite Samples.** Before the preparation of FeS<sub>2</sub>@S and FeS<sub>2</sub> samples, the corresponding iron-based fluoride precursors of FeF<sub>2</sub> and FeF<sub>3</sub> were respectively decorated via a simple polydopamine (PDA) coating method.[S1] In a typical synthesis, the commercial FeF<sub>2</sub> (Alfa Aesar, 98%) or FeF<sub>3</sub> (Strem, 99%) powder and dopamine hydrochloride (Aladdin, 98%) in a mass ratio of 2:1 were successively dispersed into Tris-buffer solution (10 mM, pH ≈ 8.5) with magnetic stirring for 12 h. The resultant product was collected via centrifugation, washed with deionized water and ethanol, followed by subsequent drying under vacuum at 80 °C overnight. The sulfuration process refers to our previous work.[S2] In brief, the FeF<sub>2</sub>-PDA (or

FeF<sub>3</sub>-PDA) and elemental sulfur (Sigma Aldrich, 99.995%) were mixed in a molar ratio of 6:7 (or 4:5) and continuously heated at 500 °C with a rising rate of 2 °C/min for 10 h under evacuated and sealed condition. The excess sulfur probably precipitates in the final product.

**Synthesis of Carbon Derivative from FeF<sub>x</sub>-PDA.** For preparation of the carbon derivative FeF<sub>x</sub>-PDA-C, the PDA-coated fluorides were annealed without simultaneous sulfuration, and they transform into Fe-FeC<sub>x</sub>@C composites. The annealed products were etched in concentrated HCl solution for 10 h to remove Fe-contained species. Finally, the resulting carbon derivatives were obtained by washing with deionized water, filtrating and drying under vacuum overnight.

**Visualized Polysulfide Adsorption Test.** Li<sub>2</sub>S<sub>4</sub> solution (0.25 M) was prepared by dissolving sulfur and lithium sulfide (Li<sub>2</sub>S) with a molar ratio of 3:1 in tetraethylene glycol dimethyl ether (TEGDME, Sigma Aldrich) followed by vigorous magnetic stirring for 24 h at 60 °C. The concentration of solution was further diluted into 2.5 mM for adsorption test. 10 mg FeF<sub>2</sub>-PDA-C, FeF<sub>3</sub>-PDA-C or 20 mg commercial FeS<sub>2</sub> were dispersed in 4.0 mL of the diluted Li<sub>2</sub>S<sub>4</sub>/TEGDME solution to achieve thorough adsorption by stirring for 10 h. After adsorption, the suspensions were stayed for a long time until the absorbents were completely precipitated with clear supernatant solutions, for a comparison with the blank control of diluted Li<sub>2</sub>S<sub>4</sub> solution.

**Physical Characterization.** The components and crystallographic structure of both the pyrite samples were analyzed by X-ray powder diffractometer (XRD, Bruker, D8 Discover) with Cu K $\alpha$  radiation in a 2 $\theta$  range of 10 °–80 ° at a scan rate of 5 °/min. The scanning electron microscopy (SEM, Magellan 400L, FEI) equipped with energy dispersive X-ray spectroscope (EDS) were carried out to observe the morphology, grain size, and element distribution. Transmission electron microscopy (TEM) images and selected area electron diffraction (SAED) patterns of FeS<sub>2</sub>@S were collected on JEOL JSM-6700F operated at an acceleration voltage of 200 kV to further confirm the morphology, microstructure, and phase assignment. X-ray photoelectron spectra (XPS) were obtained by PHI5300 XPS spectrometer (250W, 14kV) with an Mg anode source to detect the surface component, elemental valence, and bonding situation of FeS<sub>2</sub>@S

and FeS<sub>2</sub>. DSC 800 from PerkinElmer was performed to take the thermogravimetric analysis (TGA) results under N<sub>2</sub> gas stream and the heating rate of 10 °C/min.

**Electrochemical Measurement.** To preparing the cathodes, a mixture of pyrite powder (FeS<sub>2</sub>@S or FeS<sub>2</sub>), super P and poly (vinyl difluoride) (PVDF, which is uniformly dissolved in 1-methyl-2-pyrrolidinone NMP) with a weight ratio of 7:2:1 was pasted on pure copper foil and dried in vacuum at 50 °C for 20 h to remove solvent. CR2032-type coin cells were assembled with pyrite cathode, high-purity Li/Na metal anode and glass fiber separator (GF/B, Whatman) in an Ar-filled glove box (<0.1 ppm for water and oxygen). The electrolyte solution for Li or Na metal batteries was prepared by dissolving 1M lithium bis(trifluoromethane)sulfonamide (LiTFSI, Sigma Aldrich) or 1 M sodium trifluoromethanesulfonate (NaSO<sub>3</sub>CF<sub>3</sub>, Aladdin) in diglyme (DGM, Sigma Aldrich, 99.5%), respectively. Galvanostatic charge-discharge measurements of pyrite cathodes vs. Li/Li<sup>+</sup> (Na/Na<sup>+</sup>) were performed at room temperature under different rates from 0.1 to 10 C in a voltage range of 1.0–3.0 V for Li cells or 0.5–3.0 V for Na cells on the Land multichannel battery testing system (CT2001A). One C denotes the current density to theoretically achieve four-electron transfer within 1 h for FeS<sub>2</sub>. Impedance measurements of cells based on different pyrites before cycling and after different cycling at 1C were done by using a Solartron frequency analyzer (1260–1296) in a frequency range from 100 kHz to 0.1 Hz. Cyclic voltammetry (CV) and Tafel analysis were carried out on an electrochemical workstation (VersaSTAT3, AMETEK Scientific Instruments). CV measurements were run in a voltage range from 1.0 to 3.0 V for Li cells or from 0.5 to 3.0 V for Na cells at different scan rates from 0.2 to 1.5 mV/s. Tafel analysis was performed on the tenth discharge process by holding the Li or Na cells at 1.62 V or 1.52 V respectively (i.e. at the voltage of dominant conversion plateau) for 1 h, followed by a linear scan at 1 mV/s in the voltage range of ±150 mV around the open-circuit voltage.

**Calculation Details.** The first-principles calculations were performed in the framework of the density-function theory using the plane wave basis VASP code,[S3,S4] implementing the generalized gradient approximation (GGA) of

Perdew-Burke-Ernzerhof (PBE) form.[S5] The interactions between the ions and electrons were described by the all-electron projector augmented wave (PAW) method,[S6,S7] with plane waves up to a cutoff energy of 500 eV. The Hubbard  $U$  (DFT+ $U$ ) correction was used, and an effective interaction parameter  $U_{\text{eff}} = 5.3$  eV was used for Fe 3d electrons.[S8] Spin polarized calculations were performed in all configurations. To avoid the interactions between adjacent layers, the vacuum distance was set to 20 Å. The Brillouin-zone integrations were performed on the grid of Monkhorst-Pack procedure with  $2 \times 2 \times 1$   $k$ -point meshes.[S9] The binding strength between  $\text{S}_8/\text{Li}_2\text{S}_n$  and the substrate material (SM) was evaluated by the binding energy ( $E_b$ ), which is described as  $E_b = E_{\text{S}_8/\text{Li}_2\text{S}_n+\text{SM}} - E_{\text{S}_8/\text{Li}_2\text{S}_n} - E_{\text{SM}}$ , where  $E_{\text{SM}}$ ,  $E_{\text{S}_8/\text{Li}_2\text{S}_n}$  and  $E_{\text{S}_8/\text{Li}_2\text{S}_n+\text{SM}}$  represent the total energies of the substrate, the sulfur molecule  $\text{S}_8$  (or polysulfide molecule  $\text{Li}_2\text{S}_n$ ), and the pair of substrate and sulfur molecule  $\text{S}_8$  (or polysulfide molecule  $\text{Li}_2\text{S}_n$ ). Therefore, a negative binding energy shows that the binding interaction between  $\text{S}_8/\text{Li}_2\text{S}_n$  and SM is favored.

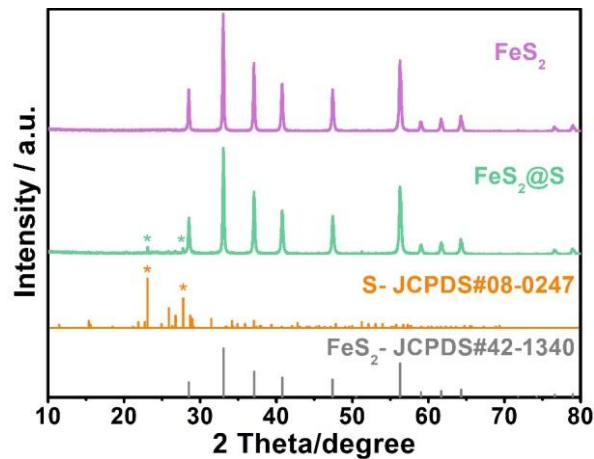

**Figure S1.** XRD patterns of  $\text{FeS}_2$  and  $\text{FeS}_2@\text{S}$  in a  $2\theta$  range of  $10^\circ$ – $80^\circ$ .

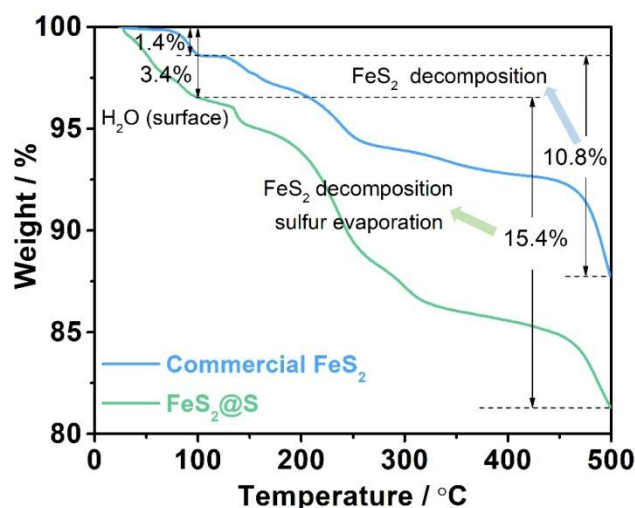

**Figure S2.** TGA curves of  $\text{FeS}_2@S$  and commercial  $\text{FeS}_2$  with weight loss estimated based on the mass evolution under an  $\text{N}_2$  gas stream from room temperature to 500 °C. Nanostructured  $\text{FeS}_2@S$  tends to absorb moisture during air exposure, thus more weight loss below 120 °C corresponds to the removal of surface water. At higher temperatures, pyrite probably undergoes partial decomposition involving the escape of S-S moieties from  $\text{FeS}_2$  lattices under  $\text{N}_2$  flowing.[S10] More dramatic TGA curve dropping for  $\text{FeS}_2@S$  within a temperature range of 100–500 °C is associated with the complete evaporation of elemental sulfur.

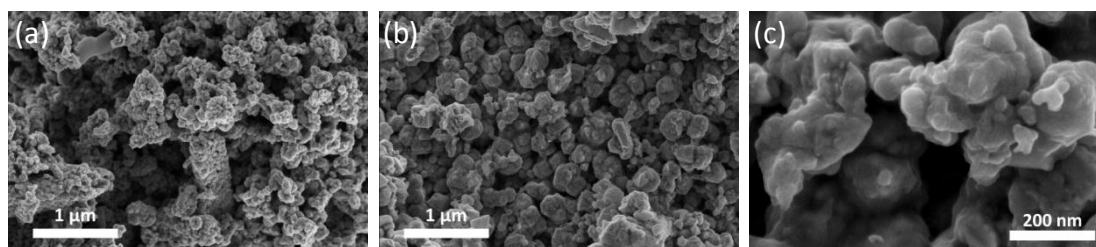

**Figure S3.** SEM images of (a)  $\text{FeS}_2@S$  and (b)  $\text{FeS}_2$  in overview scale. (c) SEM image of  $\text{FeS}_2$  in magnified scale.

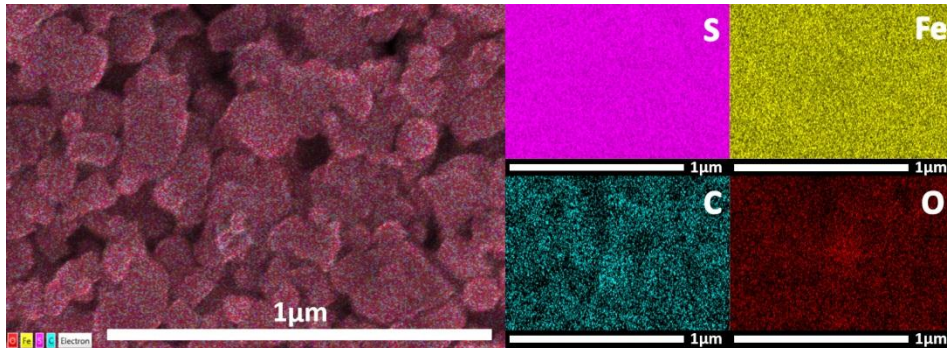

**Figure S4.** EDS mapping images (containing Fe, S, C and O elements) of FeS<sub>2</sub>@S.

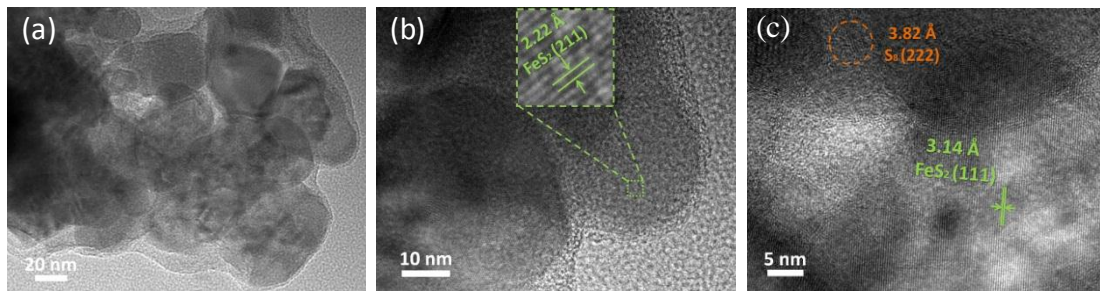

**Figure S5.** (a) TEM and (b,c) HRTEM images of FeS<sub>2</sub>@S. Continuous and conformal carbon coatings on the surface of compactly stacked grains are clearly observed. The typical stripes with lattice d-spacing of 2.22 Å and 3.14 Å correspond to (211) and (111) planes of cubic FeS<sub>2</sub> phase. The S lattice stripes for (222) plane are found in the grain boundary.

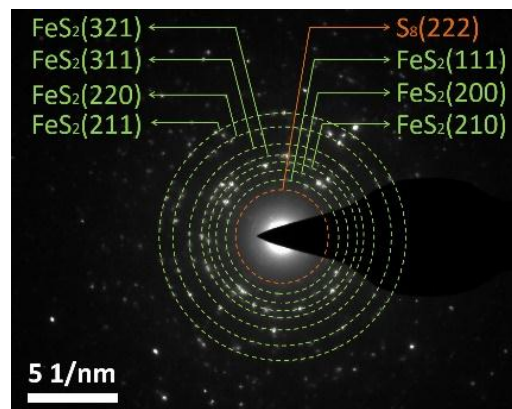

**Figure S6.** SAED pattern of FeS<sub>2</sub>@S. There is a vague diffraction ring with small radius, which is assigned to (222) plane of elemental sulfur, besides the dominant diffraction rings belonging to pyrite FeS<sub>2</sub> phase.



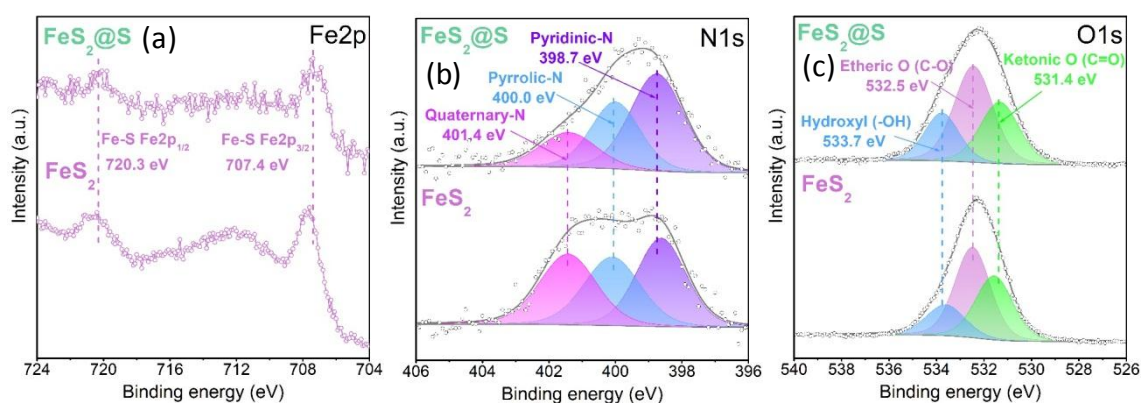

**Figure S7.** XPS spectra of (a) Fe 2p, (b) N 1s and (c) O 1s for FeS<sub>2</sub>@S and FeS<sub>2</sub>.

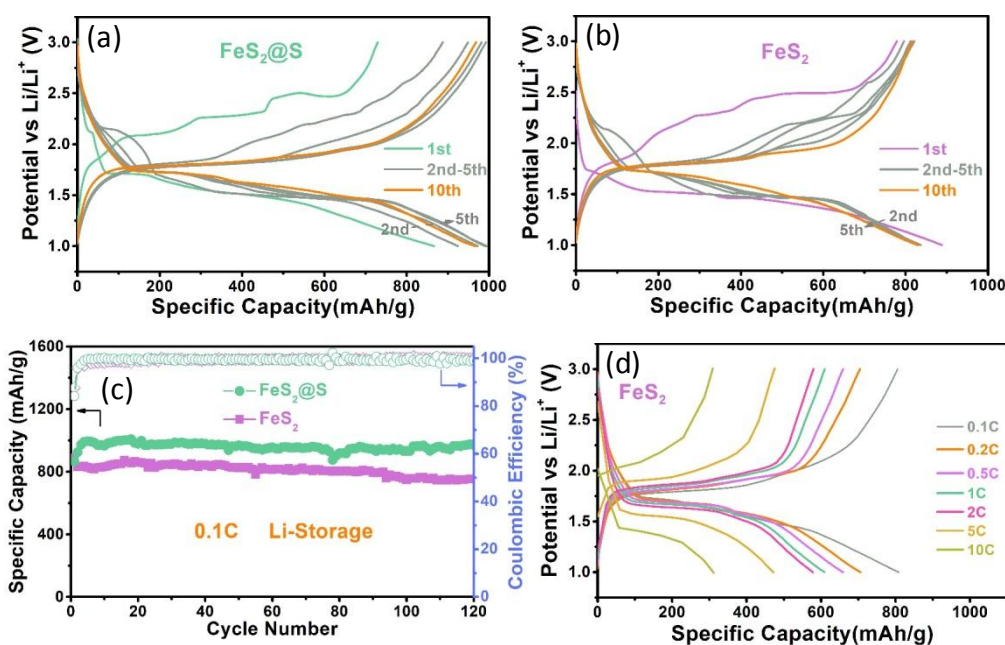

**Figure S8.** Galvanostatic charge-discharge curves of Li cells based on (a) FeS<sub>2</sub>@S and (b) FeS<sub>2</sub> cathodes during the first ten cycles at 0.1 C in a voltage range of 1.0–3.0 V. (c) Cycling performance and coulombic efficiency of FeS<sub>2</sub>@S and its comparison with FeS<sub>2</sub> at 0.1 C. (d) Galvanostatic charge-discharge curves of Li/FeS<sub>2</sub> cell depending on various rates from 0.1 to 10 C. The capacity of Li/FeS<sub>2</sub>@S cell undergoes an activation process and even exceeds the theoretical value of pyrite during initial cycles, indicating an effective utilization of extra S–S moieties.

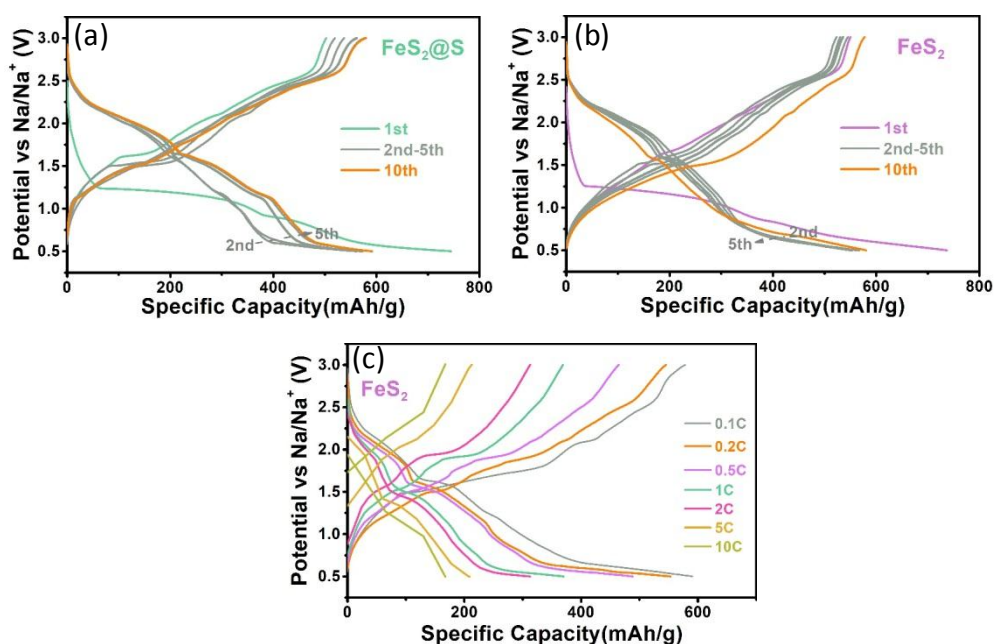

**Figure S9.** Galvanostatic charge-discharge curves of Na cells based on (a) FeS<sub>2</sub>@S and (b) FeS<sub>2</sub> cathodes in a voltage range of 0.5–3.0 V at 0.2 C during the first ten cycles. (c) Galvanostatic charge-discharge curves of Na/FeS<sub>2</sub> cell under different rates from 0.1 to 10 C.

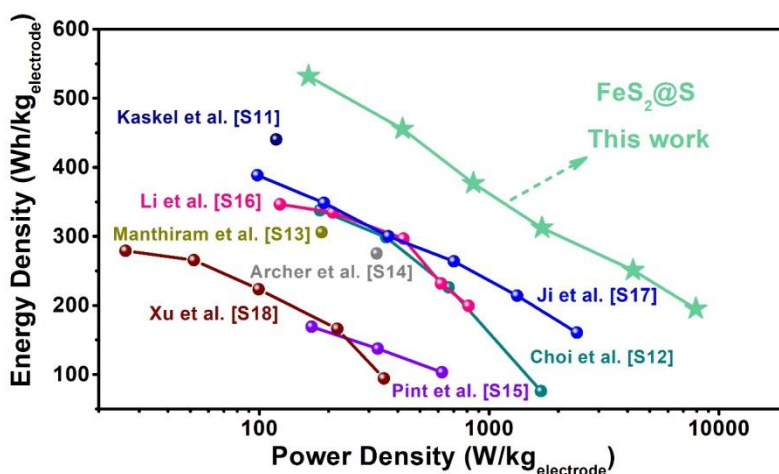

**Figure S10.** Comparison of energy and power densities between Na/FeS<sub>2</sub>@S cell and some reported room temperature Na–S batteries. The energy/power density is estimated based on the weight of electrode including active material, conductive additive and binder.



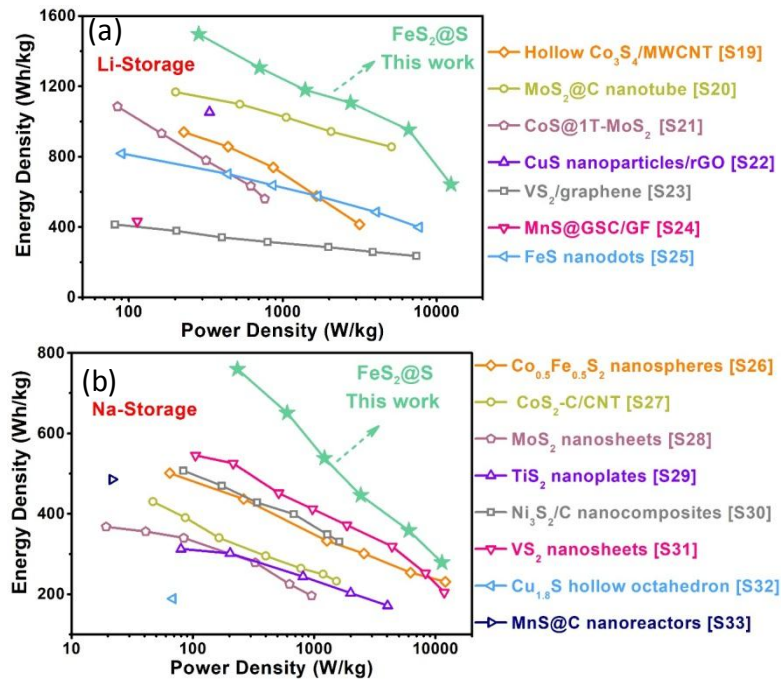

**Figure S11.** Ragone plots of as-prepared FeS<sub>2</sub>@S composite and other typical metal sulfides for (a) Li-storage and (b) Na-storage.

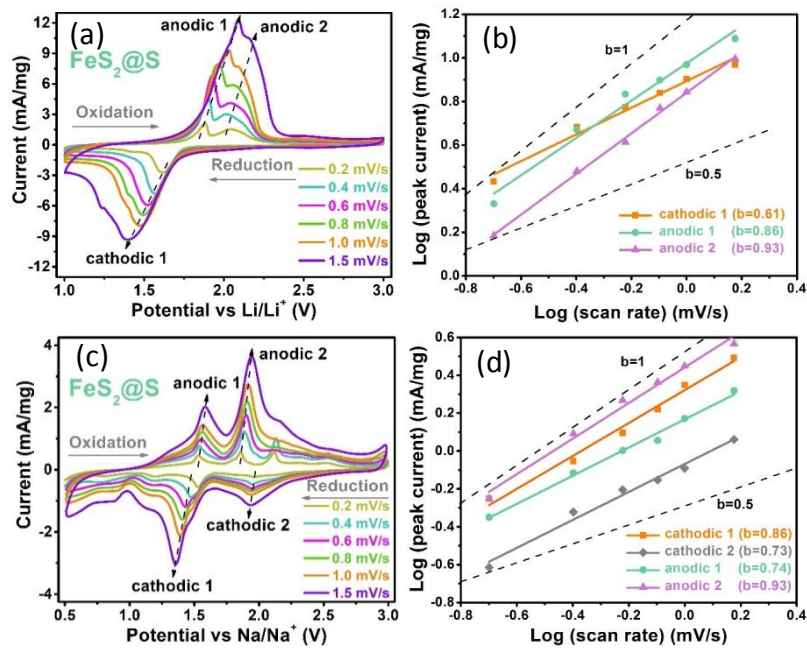

**Figure S12.** CV curves of  $\text{FeS}_2@\text{S}$  cathode at various scan rates from 0.2 to 1.5 mV/s (a) between 1.0 and 3.0 V for Li cell and (c) between 0.5 and 3.0 V for Na cell with the characteristic peaks labeled. Power law dependence of measured current on scan rate at the positions of characteristic peaks in CV curves based on  $\log i(V) = b \log v + \log a$  for (b) Li cell and (d) Na cell based on  $\text{FeS}_2@\text{S}$  cathode.

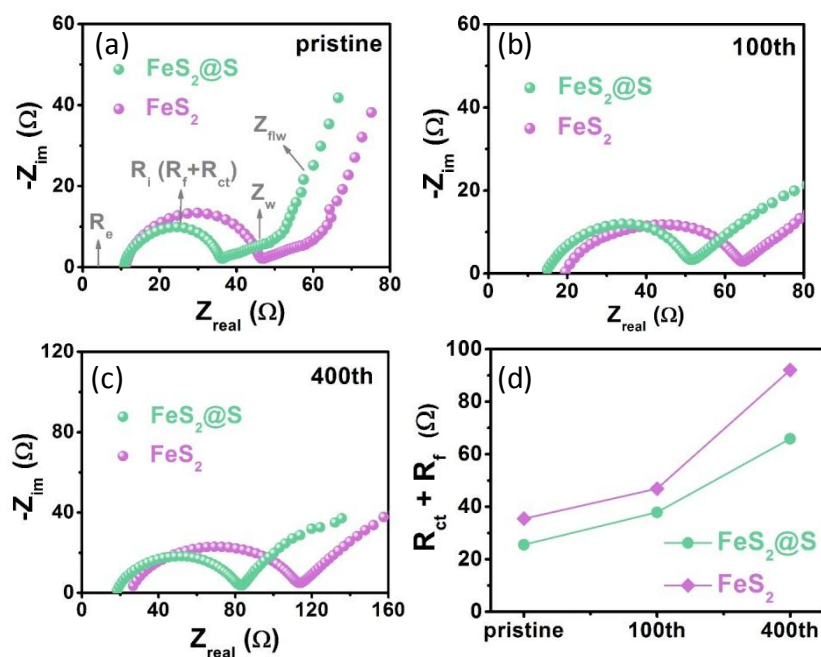

**Figure S13.** Electrochemical impedance spectra of (a) pristine and cycled Li cells based on  $\text{FeS}_2@\text{S}$  and  $\text{FeS}_2$  cathodes after (b) 100 cycles and (c) 400 cycles at 1 C. (d) Corresponding evolution of interface resistance  $R_{\text{f}}$  values (from the total contribution of SEI resistance  $R_{\text{f}}$  and charge transfer resistance  $R_{\text{ct}}$ ) for pristine and cycled Li cells.

**Table S1.** Computational details of binding energies between  $\text{Li}_2\text{S}_n$  species and  $\text{FeS}_2$  substrate. The energies of  $\text{FeS}_2$ ,  $\text{Li}_2\text{S}_n$  molecules, their combinations, and corresponding binding energies are tabulated.

| Polysulfide Molecules   | $E_{\text{Li}_2\text{S}_n}$ (eV) | Substrate      | $E_{\text{SM}}$ (eV) | $E_{\text{Li}_2\text{S}_n+\text{SM}}$ (eV) | $E_b$ (eV) |
|-------------------------|----------------------------------|----------------|----------------------|--------------------------------------------|------------|
| $\text{Li}_2\text{S}$   | -7.91                            |                |                      | -685.23                                    | -2.59      |
| $\text{Li}_2\text{S}_2$ | -13.02                           |                |                      | -688.98                                    | -1.23      |
| $\text{Li}_2\text{S}_4$ | -22.38                           | $\text{FeS}_2$ | -674.73              | -701.69                                    | -4.58      |
| $\text{Li}_2\text{S}_6$ | -32.40                           |                |                      | -710.57                                    | -3.44      |
| $\text{Li}_2\text{S}_8$ | -39.13                           |                |                      | -711.79                                    | 2.07       |

## References

- [S1] M. H. Ryou, Y. M. Lee, J. K. Park, J. W. Choi, *Adv. Mater.* **2011**, *23*, 3066.
- [S2] K. Y. Chen, Y. Zhang, C. L. Li, *ACS Nano* **2018**, *12*, 12444.
- [S3] G. Kresse, J. Furthmüller, *Comp. Mater. Sci.* **1996**, *6*, 15.
- [S4] G. Kresse, J. Furthmüller, *Phys. Rev. B* **1996**, *54*, 11169.
- [S5] J. P. Perdew, K. Burke, M. Ernzerhof, *Phys. Rev. Lett.* **1996**, *77*, 3865.
- [S6] P. E. Blöchl, *Phys. Rev. B* **1994**, *50*, 17953.
- [S7] G. Kresse, D. Joubert, *Phys. Rev. B* **1999**, *59*, 1758.
- [S8] A. Jain, S. P. Ong, G. Hautier, W. Chen, W. D. Richards, S. Dacek, S. Cholia, D. Gunter, D. Skinner, G. Ceder, *APL Mater.* **2013**, *1*, 011002.
- [S9] H. J. Monkhorst, J. D. Pack, *Phys. Rev. B* **1976**, *13*, 5188.
- [S10] S. Dallek, B. Larrick, *Thermochim. Acta* **1985**, *95*, 139.
- [S11] M. Kohl, F. Borrmann, H. Althues, S. Kaskel, *Adv. Energy Mater.* **2016**, *6*, 1502185.
- [S12] T. H. Hwang, D. S. Jung, J. S. Kim, B. G. Kim, J. W. Choi, *Nano Lett.* **2013**, *13*, 4532.
- [S13] X. W. Yu, A. Manthiram, *Adv. Energy Mater.* **2015**, *5*, 1500350.
- [S14] S. Y. Wei, S. M. Xu, A. Agrawal, S. Choudhury, Y. Y. Lu, Z. Y. Tu, L. Ma, L. A. Archer, *Nat. Commun.* **2016**, *7*, 11722.
- [S15] R. Carter, L. Oakes, A. Douglas, N. Muralidharan, A. P. Cohn, C. L. Pint, *Nano*

*Lett.* **2017**, *17*, 1863.

[S16] C. L. Wang, H. Wang, X. F. Hu, E. Matios, J. M. Luo, Y. W. Zhang, X. Lu, W. Y. Li, *Adv. Energy Mater.* **2018**, *9*, 1803251.

[S17] T. J. Wu, M. J. Jing, L. Yang, G. Q. Zou, H. S. Hou, Y. Zhang, Y. Zhang, X. Y. Cao, X. B. Ji, *Adv. Energy Mater.* **2019**, *9*, 1803478.

[S18] T. T. Yang, W. Gao, B. S. Guo, R. M. Zhan, Q. J. Xu, H. He, S. J. Bao, X. Y. Li, Y. M. Chen, M. W. Xu, *J. Mater. Chem. A* **2019**, *7*, 150.

[S19] R. Tian, Y. Zhou, H. N. Duan, Y. P. Guo, H. Li, K. F. Chen, D. F. Xue, H. Z. Liu, *ACS Appl. Energy Mater.* **2018**, *1*, 402.

[S20] X. Q. Zhang, X. N. Li, J. W. Liang, Y. C. Zhu, Y. T. Qian, *Small* **2016**, *12*, 2484.

[S21] J. Lu, G. L. Xia, S. P. Gong, C. L. Wang, P. Jiang, Z. Y. Lin, D. D. Wang, Y. Yang, Q. W. Chen, *J. Mater. Chem. A* **2018**, *6*, 12613.

[S22] X. D. Ding, S. Lei, C. F. Du, Z. L. Xie, J. R. Li, X. Y. Huang, *Adv. Mater. Interfaces* **2019**, *6*, 1900038.

[S23] W. Y. Fang, H. B. Zhao, Y. P. Xie, J. H. Fang, J. Q. Xu, Z. W. Chen, *ACS Appl. Mater. Interfaces* **2015**, *7*, 13044.

[S24] X. Gao, B. Y. Wang, Y. Zhang, H. Liu, H. K. Liu, H. Wu, S. X. Dou, *Energy Storage Mater.* **2019**, *16*, 46.

[S25] C. B. Zhu, Y. R. Wen, P. A. van Aken, J. Maier, Y. Yu, *Adv. Funct. Mater.* **2015**, *25*, 2335.

[S26] K. Zhang, M. Park, L. M. Zhou, G. H. Lee, J. Shin, Z. Hu, S. L. Chou, J. Chen, Y. M. Kang, *Angew. Chem. Int. Ed.* **2016**, *55*, 12822.

[S27] Y. Ma, Y. J. Ma, D. Bresser, Y. C. Ji, D. Geiger, U. Kaiser, C. Streb, A. Varzi, S. Passerini, *ACS Nano* **2018**, *12*, 7220.

[S28] X. Q. Xie, T. Makaryan, M. Q. Zhao, K. L. Van Aken, Y. Gogotsi, G. X. Wang, *Adv. Energy Mater.* **2016**, *6*, 1502161.

[S29] Y. P. Liu, H. T. Wang, L. Cheng, N. Han, F. P. Zhao, P. R. Li, C. H. Jin, Y. G. Li, *Nano Energy* **2016**, *20*, 168.

[S30] X. Zhao, H. E. Wang, R. C. Massé, J. Cao, J. H. Sui, J. Y. Li, W. Cai, G. Z. Cao, *J. Mater. Chem. A* **2017**, *5*, 7394.

[S31] D. X. Yu, Q. Pang, Y. Gao, Y. J. Wei, C. Z. Wang, G. Chen, F. Du, *Energy Storage Mater.* **2018**, *11*, 1.

[S32] H. Park, J. Kwon, H. Choi, D. Shin, T. Song, X. W. Lou, *ACS Nano* **2018**, *12*, 2827.

[S33] Y. N. Liu, L. P. Li, J. H. Zhu, T. Meng, L. Ma, H. Zhang, M. W. Xu, J. Jiang, C. M. Li, *ACS Appl. Mater. Interfaces* **2018**, *10*, 27911.
